# Supplementary material for: Hemistepsin A Inhibits Cell Proliferation and Induces G0/G1-Phase Arrest, Cellular Senescence and Apoptosis Via the AMPK and p53/p21 Signals in Human Hepatocellular Carcinoma
Source: PubMed Central journal article supplement (PMC7277854; doi:10.3390/biom10050713), 2020-05-04
Supplement: biomolecules-10-00713-s001.pdf [file biomolecules-10-00713-s001.pdf]

**Supplementary Fig. 1.** Cell cycle profiles were measured using flow cytometry following the treatments of the cells with various concentrations of HsA for 24h. A total of 10,000 cells (within the red boundaries) were selected per each treatment. X axis indicates FSC (cell volume), and Y axis indicates SSC (cell granularity).

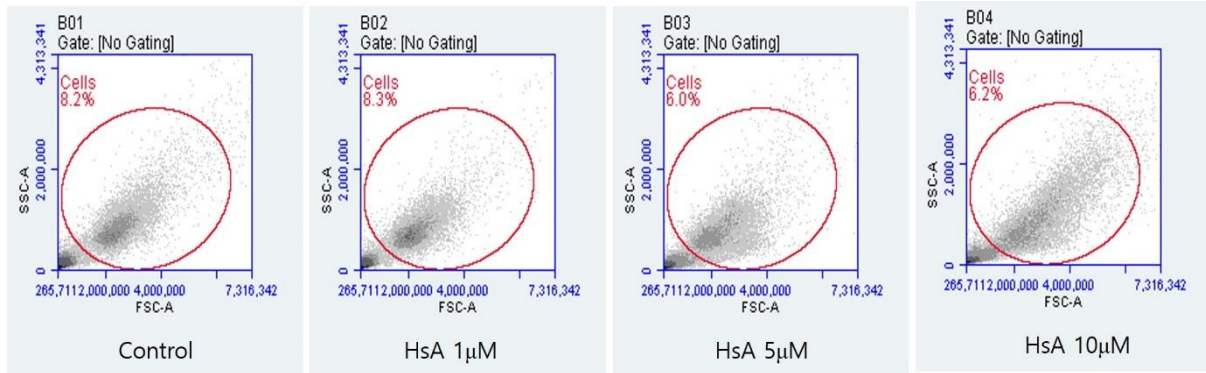

**Supplementary Table 1.** The information of antibodies used in this study. Data comprise manufacturer, item number and dilution condition.

| Antibody name                                      | Host   | Manufacturer               | Item number | Dilution ratio |
|----------------------------------------------------|--------|----------------------------|-------------|----------------|
| Anti-PARP                                          | Rabbit | Cell Signaling Technologie | 9542        | 1:1000         |
| anti-caspase3                                      | Rabbit | Cell Signaling Technologie | 9662        | 1:1000         |
| anti-ACC                                           | Rabbit | Cell Signaling Technologie | 3661        | 1:1000         |
| anti-p-AMPK                                        | Rabbit | Cell Signaling Technologie | 2531        | 1:1000         |
| anti-p-mTOR                                        | Rabbit | Cell Signaling Technologie | 2971        | 1:1000         |
| anti-mTOR                                          | Rabbit | Cell Signaling Technologie | 2972        | 1:1000         |
| anti-p-P70S6K1                                     | Rabbit | Cell Signaling Technologie | 9205        | 1:1000         |
| anti-cyclin D1                                     | Rabbit | Cell Signaling Technologie | 2978        | 1:1000         |
| anti-cyclin E1                                     | mouse  | Cell Signaling Technologie | 4129        | 1:1000         |
| anti-p53                                           | Rabbit | Cell Signaling Technologie | 9282        | 1:1000         |
| anti-CDK2                                          | mouse  | Santa Cruz Biotechnology   | sc-6248     | 1:500          |
| anti-CDK6                                          | mouse  | Santa Cruz Biotechnology   | sc-7961     | 1:500          |
| anti-Bcl2                                          | mouse  | Santa Cruz Biotechnology   | sc-7382     | 1:500          |
| anti-BAX                                           | mouse  | Santa Cruz Biotechnology   | sc-7480     | 1:500          |
| anti-p21                                           | mouse  | Santa Cruz Biotechnology   | sc-6246     | 1:500          |
| Goat anti-Rabbit IgG (H+L) Secondary Antibody, HRP | Goat   | Zymed Laboratories         | 65-6120     | 1:5000         |
| Goat anti-Mouse IgG (H+L) Secondary Antibody, HRP  | Goat   | Zymed Laboratories         | 65-6520     | 1:5000         |

**Supplementary Table 2.** The half-maximal inhibitory concentration (IC<sub>50</sub>) of HsA on several hepatocellular carcinoma cells.

| <b>Cell lines</b> | <b>IC<sub>50</sub> (μM)</b> |
|-------------------|-----------------------------|
| HepG2             | 4.792                       |
| SK-Hep1           | 7.89                        |
| SNU475            | 5.12                        |
| Huh7              | 4.93                        |
